# Supplementary material for: Predictors of work-related musculoskeletal symptoms in shoulders among nursing assistants working in nursing homes
Source: PeerJ. 2021 May 3;9:e11152. doi: 10.7717/peerj.11152 (PMC8101459; doi:10.7717/peerj.11152)
Supplement: Supplemental Information 1 [file peerj-09-11152-s001.xlsx]

## Sheet: 3.(Submitted)DataSet_PeerJ
ID1	BMI	Gender	Age	Self_Rated_Health_Status	Job_Title	DV_WRMSs_shoulders	EEs_Contribution_to_WRMSs_Sum	EEs_Encounters_frequency_Sum	PE_Sum	WorkStyle_Sum_Work_through_pain	WorkStyle_Sum_Social_reactivity	WorkStyle_Sum_Workplace_Stress	WorkStyle_Sum_Self_imposed_workplace	WorkStyle_Sum_Break	WorkStyle_Sum_Total	Ergonomic_and_Manual_Handling_Knowledge_Sum	JCQ_skill_discretion_Sum	JCQ_Decision_Authority_Sum	JCQ_Psychological_Job_Demand_Sum	JCQ_Supervisor_support_Sum	JCQ_Co_worker_support_Sum	JCQ_Patient_support_Sum	JCQ_physical_job_demand_Sum	Job_Satisfaction	Self_Rated_Job_Stress	Intention_to_leave
1	17.1	0	69	0	0	0	8	23	82	21	0	14	5	0	35	16	9	3	23	6	9	3	8	0	0	0
2	17.2	0	43	1	0	0	6	20	81	7	4	21	7	2	34	12	12	4	12	10	12	10	7	0	0	1
3	17.6	0	58	1	0	0	2	6	50	12	5	22	9	0	39	16	14	5	16	10	12	14	10	0	1	1
4	17.79	0	58	0	0	1	5	23	65	18	3	6	2	0	27	16	10	4	12	8	13	9	8	0	0	1
5	18	0	52	0	0	1	6	25	42	1	0	8	4	0	9	17	8	2	14	11	13	10	6	0	0	1
6	18.2	0	39	1	0	0	0	21	45	1	0	4	4	0	5	16	12	3	10	10	12	10	5	0	1	1
7	18.2	0	56	0	0	1	3	7	62	8	0	2	0	0	10	13	5	3	5	8	12	8	3	0	0	1
8	18.3	0	33	0	1	0	2	4	35	14	3	15	5	3	35	19	11	6	14	10	12	10	6	0	0	0
9	18.6	0	57	0	0	1	6	13	112	18	9	29	8	0	56	16	9	4	10	10	12	12	8	0	0	0
10	18.7	0	61	2	0	0	8	17	108	4	6	21	6	1	32	17	16	3	18	8	7	4	12	0	0	1
11	18.8	0	19	1	0	1	7	22	63	13	9	20	6	2	44	15	11	2	13	5	13	7	10	0	0	0
12	19.05	0	22	0	1	1	2	4	56	17	7	5	1	1	30	17	12	6	14	10	12	9	10	0	0	0
13	19.26	0	64	0	0	1	7	21	80	11	4	16	6	2	33	18	9	6	14	6	12	10	6	0	0	0
14	19.26	0	55	0	0	0	3	10	122	12	3	27	9	2	44	18	10	4	16	7	8	7	8	0	0	0
15	19.4	0	19	2	1	0	3	8	78	8	8	12	5	2	30	16	12	3	11	9	15	11	10	0	1	0
16	19.4	0	44	0	0	0	7	21	109	15	11	11	4	0	37	13	11	4	16	10	12	10	8	0	0	0
17	19.46	0	56	1	0	0	1	9	46	7	0	5	2	0	12	11	15	2	13	3	8	7	9	0	0	1
18	19.5	0	53	2	0	0	8	20	70	12	0	14	7	3	29	20	11	5	11	12	13	10	7	0	1	1
19	19.5	0	19	0	0	1	6	16	59	8	8	19	5	2	37	16	13	4	14	10	12	13	10	0	0	1
20	19.6	0	54	1	0	0	0	0	0	2	0	2	2	2	6	15	11	6	11	10	12	10	5	0	1	1
21	19.6	0	60	0	0	1	6	18	91	12	5	19	5	0	36	17	10	4	16	9	10	8	9	0	0	0
22	19.64	0	59	0	0	1	7	22	101	14	11	24	5	3	52	17	11	3	16	7	10	8	11	0	0	1
23	19.7	0	50	2	0	1	2	15	22	10	0	10	0	0	20	17	13	6	9	13	18	15	5	0	1	1
24	19.8	0	49	1	0	1	5	12	65	8	5	8	2	0	21	16	8	2	8	5	12	8	9	0	0	1
25	19.84	0	52	0	0	0	5	12	46	15	3	12	5	1	31	15	12	5	19	15	15	15	15	0	0	0
26	19.9	0	45	0	0	1	8	22	121	17	8	19	1	2	46	19	12	4	13	8	12	5	10	1	0	0
27	19.93	0	52	1	0	1	4	16	56	3	0	7	1	0	10	17	9	4	11	10	12	9	6	0	0	1
28	20.06	0	65	1	0	0	4	8	116	9	2	8	4	0	19	18	12	5	12	9	11	9	4	0	0	0
29	20.1	0	56	1	0	1	3	7	36	11	2	4	0	0	17	15	10	4	12	8	12	9	7	0	0	1
30	20.1	0	38	0	0	1	6	24	89	15	2	5	1	0	22	16	12	3	12	8	12	9	7	0	0	1
31	20.13	0	42	1	0	0	4	10	59	2	0	1	0	0	3	16	8	5	9	12	12	9	6	0	1	1
32	20.19	0	54	1	0	1	4	9	40	7	2	13	3	0	22	16	8	3	11	8	12	7	8	0	1	1
33	20.3	0	50	0	0	1	5	21	76	19	8	19	4	2	48	15	12	5	16	7	12	5	12	1	0	1
34	20.4	0	59	2	0	0	3	8	0	2	0	3	1	3	8	17	7	5	8	13	17	12	8	0	1	1
35	20.45	0	39	1	0	0	4	13	76	1	2	6	0	0	9	8	12	5	14	8	12	9	5	0	1	1
36	20.5	0	63	2	0	0	6	14	66	4	3	10	2	0	17	16	13	4	15	10	12	10	6	0	0	1
37	20.5	0	44	0	0	1	2	15	24	7	2	11	3	3	23	17	13	4	11	11	14	8	6	0	0	1
38	20.53	0	57	0	0	0	8	24	134	12	3	5	1	0	20	15	11	2	11	8	11	9	10	0	0	0
39	20.6	0	37	1	0	1	3	12	54	4	0	9	2	1	14	14	8	5	11	10	12	9	5	0	0	1
40	20.6	0	38	1	0	0	5	15	44	12	4	5	0	1	22	19	10	5	14	8	11	10	6	0	0	0
41	20.6	0	23	0	1	1	7	17	90	10	2	10	4	0	22	13	5	4	14	6	11	5	6	0	0	0
42	20.6	0	59	0	1	1	4	19	45	17	3	24	7	3	47	17	15	5	17	13	13	10	7	0	0	0
43	20.68	0	56	2	0	1	6	18	43	7	0	13	5	4	24	16	8	4	15	10	12	10	10	0	0	1
44	20.7	0	45	1	0	1	6	17	75	12	5	9	3	3	29	14	15	5	15	10	12	11	10	0	0	0
45	20.7	0	55	1	0	0	5	13	74	12	5	17	5	2	36	19	9	3	12	10	12	10	10	0	0	1
46	20.73	0	51	2	0	0	0	0	34	3	0	8	4	0	11	17	15	4	19	14	17	15	11	0	1	1
47	20.78	0	56	0	0	1	0	0	999	999	999	999	999	999	999	999	999	999	999	999	999	999	999	999	999	999
48	20.8	0	53	0	0	0	5	12	70	5	2	6	1	0	13	17	9	5	12	10	12	9	9	0	0	1
49	20.8	0	60	1	0	1	6	17	84	7	4	20	7	2	33	14	10	4	12	11	14	10	10	0	0	0
50	20.9	0	65	0	0	0	4	19	75	4	0	6	4	0	10	19	12	4	10	10	12	10	5	0	0	1
51	20.9	0	40	1	0	0	2	8	50	1	1	10	3	2	14	14	12	4	11	9	12	10	7	0	1	1
52	20.9	0	54	1	0	1	9	23	80	5	5	11	5	2	23	17	11	5	14	10	11	10	9	0	1	1
53	20.9	0	57	0	0	1	6	20	82	8	3	15	6	1	27	17	14	5	14	10	12	10	8	0	0	0
54	20.9	0	59	0	0	0	6	21	111	16	4	22	5	3	45	18	8	3	10	7	11	7	6	0	0	1
55	20.9	0	50	0	0	1	8	22	220	23	9	30	5	0	62	14	10	4	15	10	11	11	14	0	0	1
56	21	0	53	0	0	1	9	16	101	8	0	7	6	1	16	16	12	5	14	9	11	9	6	0	0	1
57	21	0	50	2	0	1	6	13	66	11	0	12	4	0	23	17	11	4	16	11	13	10	6	0	0	0
58	21	0	38	1	0	1	0	0	74	13	4	16	7	2	35	19	11	4	13	10	12	9	10	0	0	0
59	21	0	51	0	0	1	9	30	128	12	4	24	6	1	41	17	14	3	21	8	11	8	12	0	0	0
60	21.02	0	64	1	0	0	7	23	93	13	10	41	10	0	64	15	8	4	22	6	9	6	10	1	0	1
61	21.1	0	54	0	0	0	2	13	82	3	0	3	2	0	6	19	9	3	7	5	13	11	0	0	1	1
62	21.2	0	61	1	0	0	7	26	79	1	0	6	2	4	11	15	7	5	11	10	12	10	8	0	1	1
63	21.2	0	56	0	1	1	9	13	33	12	6	5	0	0	23	13	9	3	11	7	10	7	7	0	0	0
64	21.3	0	57	0	0	1	3	25	26	2	0	2	1	0	4	14	11	4	11	10	12	10	6	0	1	1
65	21.3	0	50	1	0	1	0	0	72	12	2	11	7	1	26	17	10	4	11	10	11	9	5	0	0	0
66	21.3	0	42	2	0	1	6	28	60	19	2	6	0	2	29	18	8	3	12	10	12	10	10	0	0	1
67	21.3	0	50	1	0	1	7	17	71	12	4	15	7	1	32	17	12	3	18	10	11	9	9	0	0	0
68	21.3	0	47	0	0	1	8	24	168	21	16	28	9	4	69	17	14	6	16	8	10	10	10	0	0	0
69	21.36	0	56	0	0	1	3	8	12	10	2	6	2	0	18	13	9	4	6	9	13	9	0	0	0	1
70	21.36	0	56	0	1	1	4	8	58	9	0	13	2	1	23	17	14	6	15	10	12	11	6	0	0	0
71	21.36	0	60	1	0	0	7	22	85	6	2	15	5	3	26	17	11	4	15	9	12	10	8	0	1	1
72	21.36	0	40	0	0	1	8	28	127	10	8	17	5	0	35	16	11	5	13	7	12	8	10	0	0	0
73	21.37	0	45	2	0	0	1	17	41	2	0	1	0	0	3	16	8	3	14	10	13	9	5	0	1	1
74	21.39	0	54	0	0	1	1	10	103	3	0	2	0	0	5	19	10	5	14	10	12	10	9	0	0	1
75	21.4	0	50	1	0	0	0	0	24	1	0	1	0	1	3	15	12	5	14	13	18	15	8	0	1	1
76	21.4	0	60	2	0	0	4	19	85	3	2	11	3	2	18	16	10	3	13	9	12	9	7	0	1	1
77	21.4	0	55	1	0	0	9	23	119	16	12	16	4	0	44	15	11	3	15	8	12	8	10	0	0	0
78	21.44	0	58	1	0	1	5	20	95	14	8	16	8	1	39	17	9	3	15	8	10	9	13	0	1	0
79	21.45	0	62	0	0	0	2	13	47	6	0	15	6	0	21	18	9	4	15	9	12	10	6	0	0	0
80	21.5	0	59	0	0	0	4	11	90	4	0	6	2	0	10	18	12	4	16	10	11	10	6	0	0	1
81	21.5	0	63	2	0	1	7	28	97	6	0	16	8	2	24	15	9	3	13	10	12	10	5	0	0	1
82	21.56	0	57	2	0	1	4	26	73	5	1	6	5	0	12	14	13	4	10	9	18	15	2	0	0	1
83	21.57	0	53	0	0	1	6	26	106	22	3	27	5	0	52	17	9	6	13	10	12	10	10	0	0	0
84	21.6	0	44	1	0	1	5	17	121	13	2	4	0	0	19	18	10	6	13	10	12	10	9	0	0	0
85	21.6	0	50	2	0	0	0	0	24	6	1	25	12	0	32	14	12	5	13	11	13	10	6	0	1	1
86	21.66	0	59	0	0	1	3	10	68	12	16	7	2	0	35	19	9	3	16	10	12	9	8	0	1	1
87	21.66	0	52	2	0	1	3	10	73	11	16	24	8	4	55	16	11	5	8	13	14	10	5	0	0	1
88	21.7	0	46	1	0	1	2	17	88	5	3	7	3	1	16	14	13	5	12	9	12	9	8	0	0	0
89	21.7	0	45	2	0	0	3	10	45	4	0	13	6	0	17	16	10	6	13	10	10	8	8	0	0	1
90	21.7	0	49	1	0	0	8	16	91	8	8	21	6	4	41	14	14	4	15	8	12	9	9	0	1	1
91	21.71	0	58	1	0	1	5	16	58	8	0	3	0	2	13	17	11	5	12	10	12	10	5	0	1	1
92	21.75	0	51	1	0	0	0	9	6	5	0	7	4	1	13	11	5	1	10	15	18	15	3	0	1	1
93	21.8	0	60	1	0	0	5	18	22	5	3	16	6	2	26	17	9	4	15	10	11	8	10	0	0	0
94	21.8	0	64	0	0	1	5	20	67	14	6	23	4	0	43	13	9	5	13	10	12	10	6	0	1	1
95	21.86	0	58	1	0	1	8	18	60	11	4	7	1	2	24	19	8	4	12	8	10	8	7	0	0	1
96	21.89	0	48	1	0	1	1	2	37	5	3	9	2	1	18	15	16	7	16	10	12	10	9	0	1	1
97	21.9	0	38	0	1	1	2	13	47	7	3	17	6	1	28	18	16	5	18	8	9	11	8	0	0	1
98	22	0	47	1	0	0	0	0	82	8	0	2	2	0	10	19	9	8	9	13	18	8	1	0	1	1
99	22	0	47	1	0	0	3	6	85	9	2	10	3	1	22	17	8	4	13	6	8	9	9	0	0	1
100	22.07	0	44	0	0	0	3	6	76	9	4	8	2	3	24	17	12	4	15	10	12	10	11	0	0	1
101	22.07	0	61	1	0	1	8	30	171	12	3	11	4	1	27	15	11	4	13	10	12	10	9	0	0	1
102	22.07	0	46	2	0	0	2	6	69	10	16	17	8	1	44	16	12	6	15	13	11	11	7	0	1	1
103	22.1	0	51	2	0	1	2	5	74	3	0	0	0	0	3	17	14	5	12	9	12	11	0	0	0	1
104	22.1	0	64	1	0	1	0	9	40	1	0	7	5	2	10	17	9	5	10	10	12	9	5	0	0	1
105	22.1	0	45	2	0	0	0	8	45	8	0	9	1	1	18	17	8	2	11	9	11	8	7	0	0	1
106	22.12	0	36	0	0	1	8	16	86	8	7	12	3	4	31	12	10	6	13	10	12	10	6	0	1	1
107	22.2	0	59	0	1	1	9	22	2	3	0	0	0	4	7	15	8	4	13	10	12	10	8	0	1	1
108	22.22	0	49	1	0	1	0	13	48	12	0	10	5	3	25	18	12	5	13	11	13	10	6	0	1	1
109	22.3	1	50	0	0	1	2	4	68	5	0	5	2	6	16	14	11	6	14	9	12	10	7	0	1	1
110	22.3	0	55	0	0	1	6	12	47	11	0	4	0	2	17	16	10	5	15	10	13	10	5	0	0	1
111	22.3	0	54	0	0	1	9	30	93	12	0	8	0	0	20	15	11	4	14	10	12	10	9	0	0	0
112	22.3	0	54	0	0	1	5	13	62	9	4	17	4	2	32	18	11	4	12	10	12	10	10	0	0	0
113	22.3	0	54	1	0	0	0	0	59	7	3	21	7	2	33	16	13	4	13	9	14	11	8	0	1	0
114	22.3	0	50	1	1	1	6	19	71	11	7	17	5	2	37	17	17	5	23	11	12	10	12	0	0	1
115	22.33	0	48	1	0	0	0	0	23	2	0	0	0	1	3	15	7	5	13	10	12	10	6	0	1	1
116	22.4	0	49	0	0	0	6	22	89	14	0	5	4	0	19	15	16	7	16	12	18	15	9	0	0	1
117	22.41	0	50	0	0	0	0	0	125	8	0	14	2	3	25	10	8	3	10	9	11	8	6	0	0	1
118	22.48	0	60	0	0	0	3	8	72	8	3	15	6	1	27	16	11	5	12	11	16	12	1	0	1	1
119	22.5	0	62	0	1	1	4	9	2	7	0	0	0	3	10	16	10	4	11	10	15	10	4	0	1	1
120	22.5	0	59	0	0	1	6	10	68	8	1	7	4	3	19	19	12	4	13	10	12	10	8	0	0	1
121	22.5	0	51	0	0	1	4	10	88	12	13	21	6	3	49	18	11	5	15	9	13	11	6	0	0	1
122	22.59	0	57	1	0	0	4	15	146	11	5	21	5	2	39	17	11	4	17	9	9	7	7	0	0	1
123	22.6	0	36	2	0	0	0	0	54	1	0	10	5	4	15	17	13	7	12	13	17	15	6	0	1	1
124	22.6	0	38	0	0	1	3	12	69	10	4	17	10	4	35	19	11	3	12	10	12	10	8	0	0	0
125	22.6	0	34	1	1	1	7	16	43	12	8	27	5	2	49	16	12	3	19	11	10	5	11	1	0	0
126	22.64	0	57	1	0	0	4	12	77	5	0	9	2	3	17	15	10	4	14	9	12	9	6	0	0	0
127	22.68	0	33	0	0	1	5	11	102	2	0	11	6	4	17	17	12	5	12	11	13	11	7	0	0	1
128	22.69	0	20	1	0	0	1	2	51	6	9	19	4	2	36	15	17	4	21	8	13	11	9	0	1	1
129	22.7	0	50	1	0	1	6	17	55	10	3	7	3	1	21	17	9	3	11	10	12	10	7	0	0	0
130	22.7	0	49	0	1	0	9	18	46	12	4	12	3	1	29	17	12	5	15	9	11	10	10	0	0	0
131	22.7	0	61	2	0	0	1	2	82	12	16	25	8	0	53	15	10	3	14	8	12	9	10	0	0	1
132	22.71	0	52	0	1	0	0	0	64	1	0	0	0	0	1	19	12	6	15	7	11	10	10	0	0	1
133	22.76	0	59	1	0	0	4	20	57	10	0	11	2	2	23	17	9	4	13	7	12	8	6	0	0	1
134	22.76	0	57	0	0	1	6	20	62	10	0	16	8	0	26	19	11	5	14	10	12	10	8	0	0	1
135	22.77	0	57	0	0	1	9	23	86	7	2	5	4	1	15	18	11	6	14	10	12	10	10	0	0	0
136	22.8	0	51	1	0	0	8	8	76	12	3	10	3	0	25	16	11	5	12	9	12	10	9	0	0	0
137	22.86	0	46	1	0	1	4	21	73	9	1	11	6	0	21	18	4	4	7	11	11	10	5	0	1	1
138	22.9	0	24	1	1	1	4	13	70	7	4	14	5	4	29	16	12	6	15	10	16	10	11	0	0	0
139	22.9	0	55	0	0	1	9	18	79	10	3	17	6	3	33	14	9	4	13	10	12	10	7	0	0	1
140	22.9	0	55	0	0	1	5	15	51	10	8	18	3	1	37	13	12	4	13	9	12	11	7	0	0	1
141	23.07	0	51	1	0	1	2	8	41	10	0	0	0	2	12	15	9	4	13	11	16	8	8	0	1	1
142	23.1	0	59	0	0	0	1	2	20	1	0	0	0	1	2	17	9	4	12	12	13	10	6	0	1	1
143	23.1	0	67	0	0	1	7	22	97	8	4	4	1	0	16	16	10	4	11	8	11	7	6	0	0	0
144	23.1	0	64	1	0	1	5	17	75	12	11	17	5	5	45	16	12	6	15	10	12	10	9	0	0	1
145	23.12	0	33	1	0	0	4	16	58	11	0	4	2	2	17	8	10	4	15	8	12	10	8	0	0	0
146	23.12	0	61	0	1	1	7	18	67	10	5	22	6	1	38	16	9	3	16	6	9	7	6	1	0	0
147	23.2	0	62	2	0	1	8	28	60	6	1	9	2	2	18	16	11	4	14	10	12	10	5	0	1	1
148	23.2	0	57	0	0	0	3	10	17	14	5	11	2	0	30	18	11	4	16	10	9	8	7	0	0	0
149	23.2	0	60	0	0	1	7	19	75	12	4	24	5	0	40	18	11	4	15	9	12	10	6	0	0	0
150	23.24	0	69	1	0	0	2	23	63	5	11	8	5	1	25	13	10	5	12	14	12	10	6	0	1	1
151	23.26	0	42	0	0	0	1	2	102	10	4	15	4	2	31	17	10	4	13	10	11	8	6	0	0	1
152	23.3	0	60	0	0	0	0	0	103	2	0	2	0	3	7	18	10	3	11	9	12	10	8	0	0	1
153	23.3	0	59	0	0	1	0	0	67	3	0	4	2	3	10	16	7	5	10	9	12	8	5	0	0	1
154	23.35	0	50	0	0	1	4	21	66	14	0	16	8	1	31	16	9	6	10	10	13	9	8	0	0	1
155	23.37	0	63	0	0	0	9	18	78	13	8	24	6	4	49	14	10	3	15	9	12	10	10	0	0	1
156	23.38	0	52	1	0	1	6	14	89	11	5	10	2	0	26	18	12	4	11	10	12	11	6	0	0	0
157	23.39	0	56	1	0	1	6	24	83	10	5	9	0	1	25	19	12	3	15	10	11	8	10	0	1	1
158	23.4	0	49	1	0	1	4	19	999	8	4	4	1	0	16	17	10	6	14	8	12	9	10	0	0	0
159	23.4	0	53	0	0	0	4	12	72	7	0	8	3	2	17	15	12	3	14	10	12	10	10	0	0	1
160	23.4	0	47	1	1	1	4	10	50	9	0	5	1	4	18	17	9	3	16	10	12	10	9	0	0	0
161	23.4	0	52	1	0	0	7	21	80	9	0	12	0	0	21	17	10	4	16	10	12	10	7	0	0	1
162	23.4	0	50	1	0	0	4	15	106	16	0	6	1	0	22	18	9	3	10	11	11	11	10	0	1	1
163	23.4	0	42	1	0	1	6	18	44	11	7	16	4	0	34	18	10	3	16	8	12	9	8	0	0	1
164	23.4	0	55	0	1	1	3	12	15	10	3	21	6	4	38	17	11	6	16	7	10	10	5	1	0	0
165	23.4	0	44	0	0	1	7	20	98	15	7	17	5	1	40	18	7	3	11	5	10	9	10	0	0	1
166	23.46	0	53	1	0	0	1	2	45	8	0	4	1	3	15	16	12	6	13	14	16	12	8	0	1	1
167	23.46	0	61	0	0	1	4	13	35	3	4	18	9	0	25	13	12	4	17	9	11	9	11	0	0	1
168	23.5	1	25	1	0	1	0	0	0	0	0	0	0	0	0	16	15	9	7	15	18	15	1	0	1	1
169	23.5	0	63	0	0	1	9	23	56	5	0	2	0	3	10	9	10	4	11	10	12	10	7	0	1	1
170	23.5	0	46	0	0	0	5	18	95	8	0	1	0	3	12	15	8	5	11	9	12	9	9	0	1	1
171	23.5	0	46	1	0	1	7	21	59	10	0	5	1	0	15	14	10	3	11	10	11	10	7	0	0	0
172	23.5	0	54	0	0	1	5	26	95	6	0	16	2	0	22	17	10	5	14	8	8	7	8	0	0	0
173	23.5	0	59	1	0	1	5	24	114	13	5	17	4	1	36	16	11	4	11	10	12	9	5	0	1	1
174	23.5	0	57	1	0	1	4	8	119	17	8	19	5	2	46	15	10	4	13	9	12	10	15	0	0	0
175	23.6	1	22	2	1	0	0	0	37	7	0	0	0	0	7	13	9	4	12	10	12	10	10	0	1	1
176	23.6	0	28	1	0	0	1	2	55	4	0	6	1	0	10	14	8	5	11	10	12	9	5	0	0	1
177	23.6	0	56	1	0	0	9	18	78	8	4	12	4	0	24	13	11	4	16	8	12	9	8	0	0	0
178	23.6	0	46	0	0	1	8	21	126	8	4	12	4	2	26	15	9	4	14	13	14	9	5	0	0	0
179	23.69	0	37	1	0	0	4	10	63	7	3	18	9	3	31	15	12	6	14	10	12	14	8	0	0	1
180	23.7	0	59	0	0	0	7	18	94	8	0	6	3	0	14	14	13	4	16	10	12	10	6	0	0	1
181	23.7	0	51	0	0	1	2	16	57	7	0	8	0	0	15	17	10	4	17	9	12	9	7	0	0	0
182	23.72	0	62	0	0	1	7	19	81	16	9	25	5	2	52	16	10	3	17	6	11	12	2	0	0	0
183	23.74	0	60	1	0	0	0	0	51	3	0	12	4	0	15	18	12	5	13	10	13	10	5	0	1	1
184	23.77	0	60	1	0	1	4	12	46	11	0	8	4	0	19	11	10	1	12	8	7	10	7	0	1	1
185	23.8	0	50	0	0	0	5	18	27	2	0	4	2	0	6	18	12	6	13	6	16	12	5	0	1	0
186	23.8	0	37	0	0	1	7	20	72	7	0	7	1	1	15	18	13	7	11	11	14	11	6	0	0	1
187	23.8	0	57	1	0	1	0	14	19	3	0	9	5	4	16	19	12	6	12	12	16	13	6	0	1	1
188	23.8	0	60	1	0	0	6	15	84	4	7	21	4	2	34	15	18	4	14	9	12	10	8	0	0	0
189	23.8	0	35	1	0	1	2	5	154	15	8	16	6	0	39	14	12	5	13	10	12	10	8	0	1	1
190	23.8	0	49	1	0	1	0	0	106	14	12	25	6	4	55	14	12	3	16	10	12	10	10	0	0	1
191	23.9	0	64	1	0	1	6	17	110	9	0	8	2	0	17	15	9	4	12	11	13	10	9	0	0	0
192	23.9	0	47	0	0	1	4	16	109	14	0	3	0	2	19	14	7	1	15	7	12	7	10	0	0	1
193	23.9	0	57	0	0	1	2	4	46	10	0	14	2	0	24	17	11	2	17	8	13	10	7	0	0	1
194	23.9	0	58	1	0	1	6	25	59	18	4	19	6	2	43	12	11	4	15	10	12	7	10	0	0	0
195	23.93	0	29	1	0	1	6	21	54	7	12	20	3	4	43	15	9	3	14	10	18	14	7	0	0	0
196	23.94	0	51	1	0	0	3	6	67	3	0	2	0	3	8	17	10	7	10	12	12	10	5	0	1	1
197	23.94	0	44	1	0	1	7	22	126	19	4	9	7	0	32	15	7	2	11	9	16	10	15	0	0	0
198	24	0	61	1	0	1	0	0	58	0	2	7	1	2	11	13	12	5	14	10	12	10	10	0	1	1
199	24	0	54	1	0	1	3	12	43	11	3	8	2	1	23	13	10	5	12	10	12	10	7	0	1	0
200	24	0	57	0	0	1	4	14	61	11	0	12	2	0	23	16	11	5	13	7	12	10	10	0	0	0
201	24	0	54	1	0	1	6	23	66	14	16	27	5	0	57	17	14	3	14	8	16	6	9	0	1	0
202	24.01	0	54	1	0	0	5	15	69	6	4	10	5	4	24	15	11	5	13	10	12	10	10	0	0	1
203	24.03	0	55	2	0	0	4	21	58	8	4	9	0	0	21	18	9	3	17	10	12	10	11	0	1	1
204	24.08	0	61	1	0	0	8	31	109	22	0	24	5	0	46	18	12	4	15	10	12	9	9	0	0	0
205	24.1	0	46	0	0	1	0	14	52	3	0	4	0	1	8	14	9	4	14	10	12	10	5	0	0	1
206	24.1	0	48	0	0	0	5	27	67	0	0	16	4	0	16	14	12	5	12	10	12	10	8	0	1	1
207	24.1	0	50	1	1	1	6	24	51	14	0	3	2	2	19	16	12	4	12	10	12	10	10	0	1	1
208	24.1	0	48	0	0	0	5	12	68	7	6	7	2	0	20	16	11	4	12	9	12	10	7	0	0	0
209	24.1	0	42	0	0	1	7	27	121	18	6	11	7	3	38	16	14	3	12	10	15	7	11	0	1	1
210	24.1	0	54	2	0	0	9	25	143	11	16	47	11	5	79	17	9	4	20	3	12	11	15	0	0	0
211	24.11	0	55	0	0	1	8	23	98	2	0	1	0	2	5	17	7	4	10	11	13	11	8	0	1	1
212	24.12	0	63	0	0	0	0	0	107	6	4	4	1	3	17	15	13	5	10	10	12	10	8	0	1	1
213	24.14	0	62	0	0	0	7	21	83	17	0	28	3	0	45	15	12	5	17	10	12	8	8	0	0	1
214	24.2	0	50	0	0	0	2	4	129	4	1	7	1	1	13	18	11	5	14	8	12	5	7	0	0	1
215	24.2	0	64	1	0	0	4	13	72	3	0	9	5	3	15	16	11	5	13	9	12	10	8	0	1	1
216	24.2	0	61	1	0	1	6	30	121	9	0	6	0	0	15	17	8	4	15	10	12	10	10	0	0	1
217	24.2	0	60	0	0	0	1	2	56	6	0	9	4	2	17	16	9	4	11	10	12	9	4	0	0	1
218	24.2	0	60	1	0	0	4	14	104	4	1	23	6	0	28	16	7	4	15	8	9	9	9	0	1	1
219	24.2	0	57	2	0	1	5	14	70	14	2	14	3	0	30	13	12	5	10	9	11	8	10	0	0	0
220	24.2	0	57	1	0	1	4	12	96	15	12	20	6	3	50	18	9	5	13	7	9	10	5	1	0	0
221	24.3	0	52	1	0	0	4	21	56	0	0	2	0	2	4	14	10	4	13	8	12	10	10	0	0	1
222	24.3	0	48	0	0	0	2	6	52	3	0	2	0	0	5	14	11	5	12	8	11	10	9	0	0	1
223	24.3	0	51	0	0	0	3	16	42	6	0	2	0	2	10	17	9	5	9	11	15	11	6	0	0	0
224	24.3	0	51	0	0	1	3	12	22	10	0	4	1	0	14	14	13	4	5	5	14	11	7	0	0	1
225	24.3	0	59	0	0	0	9	25	116	14	5	15	2	0	34	16	10	3	18	10	11	10	10	0	0	1
226	24.3	0	40	0	0	1	3	6	148	15	16	25	5	3	59	16	9	5	13	10	12	10	8	0	0	1
227	24.31	0	64	2	0	0	4	8	62	3	0	7	3	0	10	17	13	4	10	11	17	10	9	0	0	1
228	24.4	0	58	2	0	1	3	6	79	10	2	5	0	0	17	14	7	5	10	10	12	10	6	0	0	1
229	24.4	0	51	1	1	1	3	12	37	9	0	14	4	3	26	19	13	3	13	11	13	10	7	0	0	1
230	24.4	0	38	0	0	1	8	27	132	14	0	19	4	6	39	15	16	6	20	10	16	13	9	0	0	1
231	24.4	0	61	0	0	1	7	23	86	18	12	30	8	1	61	18	12	5	14	10	12	11	6	0	0	0
232	24.45	0	42	0	0	1	3	6	67	14	1	5	3	3	23	19	11	5	16	11	12	10	15	0	0	0
233	24.5	0	46	2	0	0	6	14	24	2	1	3	0	0	6	18	11	2	12	10	14	9	5	0	1	1
234	24.5	1	19	1	1	0	3	8	42	6	4	17	4	3	30	19	11	5	13	8	12	10	5	0	0	0
235	24.5	0	58	0	0	0	0	0	93	5	9	32	6	0	46	18	13	3	19	8	11	8	11	0	0	0
236	24.51	0	66	1	0	0	2	8	70	20	16	46	12	0	82	14	6	7	13	10	15	15	10	0	0	1
237	24.52	0	51	0	0	0	6	17	158	19	10	11	999	2	42	14	10	3	12	8	11	8	9	0	0	1
238	24.54	0	62	1	0	0	0	0	19	2	0	4	4	4	10	16	9	5	11	10	12	10	4	0	1	1
239	24.56	0	52	1	0	1	3	6	102	6	0	9	2	0	15	15	9	4	13	10	12	10	7	0	0	1
240	24.58	0	58	2	0	0	4	14	116	5	0	13	4	2	20	16	8	3	11	7	11	9	8	0	0	1
241	24.6	0	41	0	0	0	2	15	88	2	0	4	3	1	7	15	8	6	11	10	12	9	8	0	0	1
242	24.6	0	48	1	1	0	6	21	41	4	1	5	3	0	10	19	10	4	12	9	12	10	6	0	1	1
243	24.6	0	57	0	0	1	6	16	87	10	3	22	6	3	38	16	8	3	14	9	12	9	8	0	0	1
244	24.6	0	20	2	1	1	7	21	62	11	13	26	6	3	53	15	11	5	18	8	12	10	10	0	0	1
245	24.65	0	46	0	0	1	3	8	25	11	4	13	4	2	30	16	11	3	16	8	12	7	9	0	0	1
246	24.67	0	45	1	1	0	2	17	31	4	0	9	4	3	16	18	13	6	13	10	11	9	5	#NULL!	0	1
247	24.8	0	39	0	0	0	0	0	117	4	0	4	0	1	9	18	12	6	13	10	12	10	9	0	0	1
248	24.8	0	62	1	0	1	6	15	139	14	5	27	8	1	47	15	11	1	16	10	12	7	9	0	0	1
249	24.8	0	24	2	0	0	6	19	27	16	12	32	9	6	66	11	8	5	15	10	12	11	8	0	0	1
250	24.9	0	53	0	1	1	6	13	52	6	0	7	1	0	13	18	12	4	16	9	12	9	12	0	0	1
251	24.9	0	65	0	0	1	2	8	70	13	3	10	4	1	27	17	9	2	14	7	12	10	7	0	1	0
252	24.9	0	55	0	0	1	5	24	68	19	4	18	4	0	41	18	9	3	13	9	12	10	8	0	0	0
253	24.9	0	58	1	0	0	0	0	81	15	16	8	6	7	46	17	9	6	9	13	17	12	8	0	1	1
254	25	0	53	2	0	1	3	18	102	7	0	1	0	3	11	15	8	5	11	9	12	9	8	0	1	1
255	25	0	42	0	0	1	5	18	83	11	0	1	1	2	14	17	12	5	13	10	12	10	6	0	1	0
256	25	0	54	2	0	0	5	14	119	4	0	11	4	3	18	14	12	5	16	11	13	10	13	0	0	1
257	25	0	57	0	0	1	9	36	166	12	4	1	0	2	19	11	16	4	16	14	17	15	7	0	0	1
258	25	0	44	1	0	0	9	17	98	8	1	9	3	5	23	16	15	5	9	6	12	9	5	0	0	0
259	25	0	61	1	0	0	4	13	102	14	7	25	7	0	46	18	12	2	14	8	12	9	11	0	0	0
260	25.04	0	38	0	0	0	9	25	127	15	8	25	4	1	49	15	11	5	13	8	9	7	9	0	0	1
261	25.1	0	57	0	0	1	7	24	99	3	0	6	2	2	11	17	9	4	15	10	12	10	9	0	1	1
262	25.1	0	47	2	0	1	0	0	23	4	0	13	9	0	17	18	11	5	13	10	12	10	6	0	0	1
263	25.16	0	47	0	0	1	7	22	93	14	3	17	5	3	37	18	11	3	12	10	11	10	7	0	0	1
264	25.2	0	55	2	1	1	2	6	57	2	0	2	0	2	6	16	18	6	16	15	17	13	11	0	0	1
265	25.2	0	59	0	0	1	6	19	90	12	8	13	5	0	33	15	12	4	12	9	12	10	6	0	0	0
266	25.23	0	60	1	0	0	7	28	154	15	2	22	10	0	39	18	11	5	13	10	12	10	11	0	0	0
267	25.25	1	54	1	0	0	0	0	115	10	0	12	12	0	22	13	12	6	12	10	12	9	10	0	0	1
268	25.26	0	62	0	0	0	8	20	69	13	8	9	2	0	30	16	12	6	14	10	11	10	8	0	0	1
269	25.3	0	46	1	0	1	0	0	34	7	0	1	1	3	11	17	12	5	12	10	11	9	7	0	0	0
270	25.3	0	56	1	0	1	1	2	85	7	0	4	2	4	15	18	12	5	12	10	12	10	7	0	0	0
271	25.3	0	58	0	0	1	7	26	62	6	0	7	4	2	15	17	8	5	12	10	13	12	5	0	0	1
272	25.31	0	54	0	0	0	7	17	85	9	8	21	6	1	39	16	9	4	11	8	11	9	6	0	0	0
273	25.31	0	46	0	0	1	9	19	74	11	6	21	7	2	40	15	10	6	12	8	9	6	8	0	1	0
274	25.33	0	30	0	0	1	4	10	70	17	5	17	4	1	40	13	7	4	13	9	11	9	8	0	0	1
275	25.38	0	60	0	0	1	0	18	110	12	8	24	6	4	48	14	11	5	10	8	12	8	8	0	0	1
276	25.4	0	45	0	0	0	1	1	48	1	0	0	0	0	1	14	10	3	11	10	12	11	5	0	1	1
277	25.4	0	54	1	0	1	4	15	119	3	0	5	0	4	12	17	11	5	9	10	12	10	6	0	0	1
278	25.4	0	50	1	0	1	4	9	87	11	4	19	5	1	35	19	11	4	16	10	10	7	9	0	0	0
279	25.46	0	50	0	0	1	7	15	163	13	6	18	6	2	39	16	14	5	12	9	13	9	7	0	0	1
280	25.47	0	49	1	0	0	9	18	92	11	8	22	6	2	43	17	11	4	14	10	12	7	7	0	1	1
281	25.56	0	67	0	0	1	9	26	64	5	0	2	0	4	11	14	11	5	12	10	12	10	5	0	0	0
282	25.6	0	57	1	1	0	2	7	107	1	0	1	0	0	2	19	8	1	9	10	12	10	2	0	0	1
283	25.6	0	39	1	0	0	5	15	41	4	0	4	2	2	10	17	10	3	11	6	11	7	9	0	0	0
284	25.6	0	55	0	0	0	2	6	53	7	5	8	4	2	22	13	12	2	16	11	11	10	10	0	0	1
285	25.64	0	46	1	0	0	6	18	26	11	2	11	0	3	27	17	12	4	13	7	11	9	6	0	1	1
286	25.66	0	999	1	0	1	2	8	70	20	16	46	12	0	82	14	7	7	13	10	15	15	10	0	0	1
287	25.68	0	44	0	1	0	7	19	164	14	3	25	9	0	42	18	12	5	15	8	11	8	9	1	0	0
288	25.69	0	45	2	0	0	1	13	113	3	4	10	3	1	18	14	10	4	12	8	7	7	7	0	0	1
289	25.7	0	52	0	0	1	5	20	4	8	0	2	0	0	10	13	8	3	13	10	12	9	10	0	1	0
290	25.7	0	60	1	0	1	6	15	100	7	4	18	6	2	31	17	10	3	16	7	8	7	6	0	0	1
291	25.7	0	30	1	0	1	7	21	145	21	0	17	4	2	40	12	13	3	15	10	11	9	10	0	0	1
292	25.7	1	50	1	1	0	9	18	76	15	8	19	4	3	45	18	11	2	10	10	10	10	10	0	0	0
293	25.73	0	61	2	0	1	6	18	75	11	7	25	7	2	45	16	10	4	13	9	9	2	14	0	1	1
294	25.8	0	59	1	0	0	3	6	81	10	3	12	2	0	25	15	11	5	13	10	12	10	7	0	0	1
295	25.8	0	49	1	0	0	0	0	67	11	7	25	7	2	45	16	8	4	13	9	11	6	14	1	0	0
296	25.8	0	47	0	0	1	5	18	74	12	5	25	6	6	48	13	11	3	12	11	12	9	10	0	0	0
297	25.81	0	42	1	0	0	0	0	12	0	0	0	0	0	0	16	10	6	12	10	12	10	5	0	1	1
298	25.89	0	58	1	0	1	3	15	24	8	4	18	7	3	33	16	11	3	17	6	9	10	7	0	0	0
299	25.9	0	41	1	0	0	2	5	35	0	0	0	0	2	2	15	7	4	11	10	12	9	5	0	1	1
300	25.94	0	58	1	0	1	5	14	154	8	0	11	2	0	19	15	7	5	16	7	8	4	12	0	0	0
301	25.97	0	43	1	1	1	0	10	5	6	0	10	5	0	16	18	12	7	6	11	13	11	6	0	1	1
302	25.98	0	48	0	0	1	5	12	120	6	0	9	4	6	21	16	7	2	7	8	18	10	4	0	1	1
303	25.99	0	66	1	0	1	9	22	109	11	0	12	1	2	25	17	14	5	13	9	13	10	7	0	0	1
304	26	0	65	1	0	1	1	2	54	5	1	9	3	0	15	13	5	4	17	11	13	10	8	0	1	1
305	26	0	63	1	0	0	2	5	70	6	4	14	4	3	27	17	11	4	15	10	12	10	6	0	0	1
306	26	0	48	1	0	0	5	10	64	8	6	14	3	3	31	17	11	4	13	10	12	10	5	0	0	0
307	26.03	1	55	2	0	0	3	12	48	7	4	16	6	3	30	16	12	1	14	9	12	9	9	0	0	0
308	26.06	0	47	1	0	0	0	9	45	0	0	6	3	0	6	16	9	4	14	10	12	10	8	0	1	#NULL!
309	26.1	0	51	2	0	0	5	17	48	7	2	0	0	0	9	13	9	5	12	10	13	10	10	0	1	1
310	26.1	0	41	1	0	1	3	8	24	7	0	4	2	1	12	18	9	3	11	8	14	10	7	0	0	1
311	26.1	0	24	0	0	1	5	13	64	9	4	15	5	2	30	16	12	6	14	11	15	10	8	0	0	0
312	26.1	0	45	1	0	1	4	8	58	11	5	13	7	4	33	15	12	5	14	10	12	10	9	0	0	1
313	26.1	0	54	0	0	0	6	22	50	19	16	29	5	0	64	16	10	3	17	8	10	8	7	1	0	0
314	26.15	0	46	2	0	1	4	15	111	9	4	6	0	1	20	13	12	3	12	7	11	7	6	0	0	0
315	26.18	0	61	0	0	1	0	12	58	6	0	3	0	2	11	16	11	4	12	7	10	6	6	0	0	0
316	26.2	0	54	0	0	0	2	4	57	10	1	4	0	4	19	15	11	5	14	9	9	10	5	0	0	1
317	26.2	0	52	0	0	0	8	21	95	16	3	14	6	0	33	17	12	4	14	11	12	10	12	0	0	1
318	26.2	0	47	1	0	1	7	22	69	12	4	18	5	0	34	16	9	4	15	10	9	10	12	0	0	0
319	26.21	0	55	0	0	0	8	27	89	14	8	24	5	0	46	14	15	4	18	10	11	10	9	0	0	0
320	26.29	0	54	0	0	0	0	0	109	6	4	12	3	2	24	17	9	4	12	9	12	9	6	0	1	1
321	26.3	0	50	2	0	0	0	0	46	1	0	6	4	6	13	17	8	6	12	10	12	10	6	0	1	1
322	26.3	0	40	1	0	1	3	11	108	9	0	14	7	2	25	18	11	4	15	10	12	10	10	0	0	1
323	26.3	0	60	0	0	1	8	21	59	14	6	12	2	0	32	18	10	4	17	6	11	12	10	0	0	1
324	26.36	0	51	1	0	1	7	27	62	18	3	16	5	4	41	16	7	2	13	5	11	10	10	0	0	1
325	26.39	0	49	2	0	0	0	0	3	3	0	0	0	0	3	13	11	4	11	10	12	9	5	0	1	1
326	26.4	0	56	0	0	0	3	8	72	12	0	8	3	0	20	16	10	4	15	10	11	9	9	0	0	0
327	26.4	0	57	0	0	0	0	0	8	5	4	13	0	0	22	17	12	6	16	9	11	9	7	0	0	1
328	26.4	0	50	1	0	1	6	14	58	9	0	11	5	2	22	18	9	4	12	10	12	10	8	0	0	1
329	26.4	0	53	1	0	0	7	14	81	11	2	14	2	0	27	13	13	5	16	10	12	10	5	0	0	0
330	26.49	0	51	1	0	1	7	24	62	6	0	0	0	4	10	14	9	4	14	10	12	10	9	0	1	1
331	26.5	0	59	2	0	1	6	14	72	8	0	11	9	8	27	18	16	8	17	12	17	9	7	0	1	1
332	26.5	0	58	0	0	0	3	29	89	12	4	17	3	2	35	14	10	6	15	10	12	10	9	0	0	0
333	26.52	0	47	1	0	0	2	5	66	6	0	10	2	0	16	16	11	5	14	9	12	7	5	0	1	1
334	26.6	0	52	1	0	0	5	18	36	8	0	3	2	0	11	16	13	6	12	10	12	10	6	0	0	1
335	26.6	0	53	1	0	0	4	12	82	13	0	8	0	0	21	18	13	5	11	10	12	9	7	0	1	0
336	26.6	0	49	1	0	1	4	14	143	13	4	6	1	5	28	16	6	3	11	7	13	10	7	0	0	1
337	26.6	0	50	1	0	1	5	20	126	19	0	12	4	4	35	16	14	7	12	14	17	11	7	0	0	0
338	26.6	0	51	0	0	1	7	26	140	22	8	26	5	2	58	15	12	5	17	10	13	10	10	0	0	0
339	26.62	0	50	0	0	0	8	32	155	12	0	19	5	2	33	15	10	4	14	10	12	10	10	0	0	0
340	26.68	0	46	0	0	1	7	28	60	20	0	38	4	0	58	15	10	3	11	7	15	10	7	0	0	1
341	26.7	0	32	0	1	1	7	14	70	9	1	11	0	0	21	15	9	5	15	10	12	11	7	1	1	0
342	26.77	0	59	2	0	1	2	17	53	11	0	6	6	0	17	16	8	4	13	10	12	10	7	0	1	1
343	26.78	0	48	2	0	1	2	4	58	7	2	15	5	6	30	18	11	5	11	7	12	10	6	0	1	1
344	26.8	0	43	0	1	1	7	18	31	14	2	7	2	1	24	17	11	5	15	7	12	8	7	0	0	1
345	26.8	0	62	0	0	1	6	19	70	9	2	16	5	2	29	16	10	4	16	7	11	6	6	0	0	1
346	26.8	0	51	0	0	1	8	28	128	15	12	17	1	4	48	14	11	3	15	8	12	10	7	0	0	0
347	26.88	0	46	1	0	1	9	20	73	11	7	25	7	2	45	16	9	4	13	9	11	3	14	1	0	0
348	26.9	0	53	0	0	1	6	18	53	15	3	11	4	0	29	17	11	6	14	11	12	10	8	0	1	0
349	27	0	56	0	0	0	0	0	26	0	0	8	0	0	8	18	11	4	13	10	13	10	6	0	1	1
350	27	0	49	1	0	0	0	0	51	0	0	8	4	0	8	15	12	5	12	7	12	9	5	0	1	1
351	27	0	62	0	0	1	6	16	25	8	4	13	5	1	26	16	10	4	10	10	10	7	8	0	0	0
352	27.13	0	52	2	0	0	9	25	106	5	1	12	5	2	20	18	11	6	11	10	12	10	9	0	0	1
353	27.14	0	50	0	0	0	8	26	103	21	8	14	2	0	43	16	12	6	16	10	9	8	12	0	0	1
354	27.14	0	51	1	0	0	7	18	75	11	7	25	7	2	45	16	10	4	13	9	9	2	14	0	1	1
355	27.2	0	40	1	0	1	6	12	73	5	0	2	2	2	9	18	11	3	11	10	12	10	10	0	1	1
356	27.2	0	56	1	0	0	0	0	110	7	2	16	8	0	25	17	10	5	14	10	11	14	9	0	0	1
357	27.2	0	53	0	0	1	4	19	52	7	2	16	5	2	27	17	10	5	9	9	12	10	5	0	0	1
358	27.21	0	58	1	0	0	3	4	76	4	0	14	6	3	21	14	14	5	14	7	11	10	8	0	0	1
359	27.27	0	62	0	0	1	1	13	50	9	2	16	5	2	29	16	10	3	15	10	11	6	6	0	0	1
360	27.3	0	53	0	0	1	9	18	73	8	1	14	4	1	24	12	11	4	11	10	12	10	7	0	1	1
361	27.38	0	47	1	1	1	9	18	57	11	4	16	7	2	33	15	16	8	15	11	12	10	7	0	0	0
362	27.4	0	50	0	0	1	2	22	86	4	0	12	2	1	17	16	13	4	13	8	11	7	6	1	1	0
363	27.4	0	50	0	0	1	7	20	62	10	6	22	5	3	41	999	9	4	15	9	10	9	7	0	0	0
364	27.54	0	57	0	0	0	5	20	101	7	10	28	4	0	45	15	7	4	21	4	11	9	8	0	0	0
365	27.58	0	46	0	1	1	8	20	76	17	6	25	4	0	48	16	10	2	15	9	7	9	6	1	0	0
366	27.6	0	49	1	0	0	0	0	4	2	0	5	1	3	10	17	11	5	15	10	11	10	7	0	0	1
367	27.6	0	54	1	0	0	5	20	67	6	0	8	2	0	14	18	9	6	12	8	13	13	3	0	0	0
368	27.6	0	61	1	0	0	4	17	117	13	16	21	6	0	50	13	15	6	14	14	18	15	6	0	0	0
369	27.68	0	51	0	0	1	9	26	130	9	4	14	6	2	29	15	12	6	12	10	12	9	6	0	0	1
370	27.7	0	52	0	0	1	4	14	51	5	3	13	4	2	23	17	12	5	13	10	12	10	9	0	1	1
371	27.7	0	48	0	0	0	3	6	94	15	0	14	4	2	31	14	15	5	18	10	12	10	15	0	0	1
372	27.7	0	57	1	0	1	7	16	105	14	8	18	5	1	41	18	11	2	18	7	8	9	8	0	0	0
373	27.93	0	56	0	0	1	4	16	142	14	0	5	1	0	19	16	10	5	9	12	13	8	8	0	1	1
374	27.93	0	53	0	0	0	6	14	83	23	4	12	7	0	39	14	12	5	12	10	12	10	5	0	0	0
375	28.1	0	50	0	0	1	9	17	103	7	0	0	0	0	7	16	14	6	10	10	10	5	0	0	0	0
376	28.3	0	59	0	0	1	8	25	64	1	0	11	4	5	17	18	9	4	14	9	12	10	10	0	0	0
377	28.4	0	45	2	0	0	2	3	40	3	0	9	2	1	13	15	10	5	11	9	11	10	6	0	1	1
378	28.4	0	65	0	0	0	7	21	121	15	0	12	2	0	27	15	11	4	12	10	12	9	5	0	0	1
379	28.4	0	55	2	0	1	5	23	112	14	1	27	6	3	45	16	10	5	20	5	10	7	14	1	0	0
380	28.5	0	48	1	0	0	4	12	89	6	0	12	6	0	18	17	11	3	14	9	12	10	6	0	0	0
381	28.5	0	53	0	0	0	0	0	106	2	2	15	5	0	19	18	10	4	15	7	12	10	10	0	0	1
382	28.56	0	51	0	0	1	3	8	31	4	0	3	0	0	7	19	11	6	14	10	11	10	6	0	0	1
383	28.56	0	50	0	1	1	9	30	70	11	5	19	5	2	37	18	9	5	15	9	12	9	7	0	0	0
384	28.7	0	62	0	0	0	6	10	65	7	6	2	0	0	15	15	12	3	13	10	12	10	5	0	1	1
385	28.8	0	49	0	0	0	0	0	39	6	0	4	1	0	10	15	11	3	11	10	12	10	10	0	1	1
386	28.84	0	60	2	0	0	2	4	102	13	2	15	999	2	32	13	14	4	13	8	11	9	7	1	0	1
387	28.88	0	61	2	0	1	0	0	27	2	0	6	3	3	11	18	10	7	8	14	15	12	1	0	0	1
388	28.9	0	43	1	0	0	0	0	71	1	0	8	3	2	11	13	12	4	16	8	12	9	10	0	0	1
389	28.9	0	47	1	0	0	5	10	97	9	7	18	4	3	37	16	11	5	14	10	12	9	6	0	0	1
390	28.96	0	45	0	0	1	9	18	147	13	11	21	6	2	47	14	999	999	999	999	999	999	999	999	999	999
391	29.1	0	52	0	0	1	7	15	41	6	0	4	3	1	11	18	7	2	11	11	16	11	8	0	1	1
392	29.1	0	61	0	0	1	7	32	134	18	4	7	4	2	31	15	10	3	14	10	15	11	10	0	0	0
393	29.2	0	37	0	0	0	1	4	63	4	3	5	1	4	16	10	12	5	14	9	12	8	5	0	1	1
394	29.2	0	64	2	0	0	0	21	106	8	0	11	8	6	25	15	9	4	12	10	12	10	10	0	0	1
395	29.2	0	43	2	0	1	9	30	64	23	4	38	11	2	67	11	10	4	20	10	11	11	11	0	0	1
396	29.26	0	45	2	0	0	8	26	78	20	16	42	12	8	86	18	7	3	10	6	10	7	8	0	1	1
397	29.3	0	51	1	0	1	5	16	78	6	3	12	3	2	23	16	10	3	12	10	12	9	8	0	1	1
398	29.48	0	56	0	0	0	7	28	96	11	12	36	10	2	61	16	12	3	17	7	10	9	10	1	0	0
399	29.5	0	60	0	0	0	4	13	43	3	0	0	0	0	3	16	7	4	7	9	13	11	1	0	1	1
400	29.5	0	58	0	0	1	8	15	29	9	0	3	1	0	12	19	10	4	11	10	12	9	8	0	0	1
401	29.5	0	48	0	0	0	5	17	46	9	4	13	6	0	26	17	18	3	15	9	16	11	8	1	0	0
402	29.58	0	57	1	0	0	9	29	149	0	6	16	7	0	22	18	13	5	14	10	12	10	8	0	0	1
403	29.6	0	51	1	0	0	5	19	123	6	0	7	0	4	17	15	5	3	9	8	8	11	6	0	1	0
404	29.6	0	48	1	0	0	6	13	116	14	3	16	6	2	35	16	11	3	16	10	12	10	10	0	0	0
405	29.62	0	45	1	0	0	3	7	60	0	0	5	5	4	9	16	7	3	10	9	12	10	7	0	1	1
406	29.8	0	52	1	0	0	3	12	63	7	0	4	2	0	11	12	9	4	11	9	12	11	10	0	0	1
407	29.8	0	65	1	0	0	2	5	58	11	6	23	6	2	42	15	8	4	12	7	12	8	5	0	0	1
408	30	0	43	1	1	1	7	13	59	9	5	14	5	1	29	16	9	4	14	11	12	14	9	0	0	0
409	30	0	58	2	0	1	7	14	159	12	7	18	3	0	37	16	9	6	11	7	10	9	10	0	0	1
410	30.05	0	42	2	0	0	1	2	1	0	0	7	2	2	9	18	8	6	11	10	12	12	5	0	1	1
411	30.2	0	41	0	0	0	7	26	61	7	16	34	4	0	57	16	16	3	13	6	7	11	15	0	0	1
412	30.3	0	53	0	0	0	5	22	28	11	0	8	1	4	23	18	10	4	15	10	12	9	9	0	0	1
413	30.3	0	56	1	1	1	6	12	64	6	8	16	6	1	31	16	12	4	15	9	11	9	5	0	1	0
414	30.33	0	32	1	0	0	5	8	89	15	16	11	4	1	43	15	14	5	15	10	14	9	10	0	1	1
415	30.4	0	56	1	0	0	4	28	67	3	2	4	0	2	11	12	9	4	15	9	13	10	8	0	0	1
416	30.46	0	50	1	0	0	4	21	64	4	5	10	6	0	19	18	13	5	16	9	12	8	10	0	1	1
417	30.5	0	52	1	0	0	0	0	74	0	0	3	3	0	3	15	9	3	11	11	13	9	6	0	1	1
418	30.56	0	58	0	0	1	5	18	104	12	16	17	8	0	45	17	11	4	12	9	12	9	8	0	0	1
419	30.7	0	52	0	1	1	5	17	44	16	12	36	9	6	70	16	12	5	17	8	11	9	10	0	0	0
420	30.8	0	40	2	0	0	1	2	118	12	4	3	1	5	24	12	10	7	10	15	18	10	8	0	0	1
421	30.8	0	63	0	0	1	6	27	110	11	0	15	3	2	28	15	7	4	13	10	12	10	7	0	0	0
422	30.8	0	58	0	0	0	7	24	65	10	6	20	6	1	37	18	9	4	14	10	10	10	5	0	0	0
423	31.1	0	47	0	0	0	4	10	66	12	4	10	8	0	26	16	10	5	11	10	12	10	9	0	0	1
424	31.4	0	56	0	0	1	8	26	148	14	2	18	5	0	34	15	13	6	14	8	12	9	10	0	0	0
425	31.8	0	57	0	0	0	8	31	100	22	0	27	6	0	49	18	12	4	15	10	12	9	9	0	0	0
426	31.84	0	68	0	0	0	7	17	78	10	0	5	3	4	19	19	11	6	10	9	13	10	6	0	1	1
427	31.92	0	50	0	0	1	1	19	16	14	1	1	1	5	21	16	11	5	9	10	12	10	5	0	1	0
428	32.5	0	35	1	0	0	0	0	48	4	8	12	2	0	24	15	12	5	15	10	12	10	5	0	0	1
429	32.63	0	63	0	0	0	4	9	77	8	5	12	4	2	27	18	9	3	13	11	16	10	8	0	1	1
430	32.89	0	57	0	0	1	4	16	61	18	14	2	2	0	34	17	8	4	12	9	12	10	9	0	0	1
431	33.1	0	54	0	0	1	5	15	81	18	13	21	5	1	53	17	10	2	13	8	12	8	10	0	0	1
432	33.2	0	29	0	0	0	1	2	67	5	4	13	3	2	24	14	9	5	10	10	12	8	6	0	1	1
433	33.3	1	22	0	1	0	1	2	0	2	1	0	0	0	3	16	13	8	8	14	13	11	5	0	0	1
434	33.71	0	23	0	0	0	4	16	149	4	3	19	9	5	31	14	7	4	15	14	16	13	7	0	1	1
435	34.05	1	65	0	0	0	0	0	0	1	0	5	0	2	8	8	10	2	3	9	15	9	2	0	1	0
436	34.5	0	54	0	0	0	1	14	73	11	10	32	8	1	54	16	11	4	13	10	11	10	8	0	0	0
437	34.6	0	50	0	0	1	2	5	84	19	2	23	6	6	50	16	9	4	12	1	12	12	14	0	1	0
438	36.5	0	65	1	0	1	0	0	58	4	0	10	3	3	17	14	12	4	13	10	14	10	5	0	1	1
439	37.6	0	23	0	0	0	4	12	87	21	0	22	6	1	44	15	13	5	15	11	11	9	9	1	0	0
440	40.4	0	43	2	0	0	0	0	50	2	12	7	3	0	21	15	12	6	13	10	14	8	6	0	1	1
